# Supplementary material for: Phenomenological Differences in Music- and Television-Evoked Autobiographical Memories
Source: Oxford University Press journal article supplement (doi:10.1525/mp.2021.38.5.435), 2021-06-01
Supplement: 2_jakubowski_etal_supplementary+materials.docx [file 2_jakubowski_etal_supplementary+materials.docx]

**Supplementary Materials**

**1. MANOVA (and post hoc univariate tests) for effects of cue type, age group, and gender on retrieval characteristics (vividness, reliving, significance, same emotions, retrieval intentionality) for familiarity-matched cues (*N* = 382)**

| **MANOVA results** | |
| --- | --- |
| Effect | Statistical Result |
| Cue Type | *F*(5, 372) = 5.32, *p* < .001, *η*2p = .067*** |
| Age Group | *F*(10, 746) = 2.68, *p* = .003, *η*2p = .035** |
| Gender | *F*(5, 372) = 0.56, *p* = .73, *η*2p = .007 |
| Cue Type × Age Group | *F*(10, 746) = 0.87, *p* = .57, *η*2p = .011 |
| Cue Type × Gender | *F*(5, 372) = 1.13, *p* = .34, *η*2p = .015 |
| Age Group × Gender | *F*(10, 746) = 2.39, *p* = .009, *η*2p = .031** |
| Cue Type × Age Group × Gender | *F*(10, 746) = 1.31, *p* = .22, *η*2p = .017 |

Note: * = *p* < .05, ** = *p* < .01, *** = *p* < .001

| **Post hoc univariate tests for effect of cue type** | | | |
| --- | --- | --- | --- |
| Retrieval Characteristic | MEAM Mean Rating (SD)  [95% CI] | TEAM Mean Rating (SD)  [95% CI] | Univariate Comparison |
| Vividness | 4.26 (0.97)  [4.18, 4.38] | 4.02 (0.99)  [3.94, 4.14] | *F*(1, 376) = 18.63, *p* < .001, *η*2p = .047* |
| Reliving | 3.84 (1.19)  [3.74, 3.98] | 3.60 (1.17)  [3.51, 3.75] | *F*(1, 376) = 13.99, *p* < .001, *η*2p = .036* |
| Significance | 3.79 (1.06)  [3.70, 3.91] | 3.53 (1.10)  [3.45, 3.68] | *F*(1, 376) = 13.14, *p* < .001, *η*2p = .034* |
| Same Emotions | 3.75 (1.15)  [3.64, 3.87] | 3.57 (1.11)  [3.45, 3.68] | *F*(1, 376) = 8.23, *p* = .004 , *η*2p = .021* |
| Retrieval Intentionality | 1.96 (1.19)  [1.86, 2.11] | 2.01 (1.09)  [1.91, 2.14] | *F*(1, 376) = 0.23, *p* = .63, *η*2p = .001 |

* significant at the Dunn-Bonferroni-corrected level of *p* < .01

None of the post hoc univariate tests for age group were statistically significant (*p*s > .12 following Dunn-Bonferroni correction). None of the post hoc univariate tests for the interaction of age group and gender were statistically significant (*p*s > .30 following Dunn-Bonferroni correction).

**2. MANOVA (and post hoc univariate tests) for effects of cue type, age group, and gender on memory description content (perceptual words, social words, word count) for familiarity-matched cues (*N* = 382)**

| **MANOVA results** | |
| --- | --- |
| Effect | Statistical Result |
| Cue Type | *F*(3, 374) = 8.83, *p* < .001, *η*2p = .066*** |
| Age Group | *F*(6, 750) = 1.48, *p* = .18, *η*2p = .012 |
| Gender | *F*(3, 374) = 5.38, *p* = .001, *η*2p = .041** |
| Cue Type × Age Group | *F*(6, 750) = 0.80, *p* = .57, *η*2p = .006 |
| Cue Type × Gender | *F*(3, 374) = 1.56, *p* = .20, *η*2p = .012 |
| Age Group × Gender | *F*(6, 750) = 0.20, *p* = .98, *η*2p = .002 |
| Cue Type × Age Group × Gender | *F*(6, 750) = 0.80, *p* = .57, *η*2p = .006 |

Note: * = *p* < .05, ** = *p* < .01, *** = *p* < .001

| **Post hoc univariate tests for effect of cue type** | | | |
| --- | --- | --- | --- |
| Memory Description Content | MEAM Mean (SD)  [95% CI] | TEAM Mean (SD)  [95% CI] | Univariate Comparison |
| Perceptual (% words) | 6.86 (9.78)  [5.70, 7.72] | 5.20 (7.76)  [4.40, 6.01] | *F*(1, 376) = 5.46, *p* = .020, *η*2p = .014 |
| Social (% words) | 13.49 (14.42)  [12.09, 15.06] | 11.29 (10.79)  [10.20, 12.42] | *F*(1, 376) = 6.21, *p* = .013, *η*2p = .016* |
| Word Count (total words) | 15.71 (16.74)  [13.98, 17.47] | 18.80 (17.60)  [16.99, 20.64] | *F*(1, 376) = 15.94, *p* < .001, *η*2p = .041* |

* significant at the Dunn-Bonferroni-corrected level of *p* < .0167

| **Post hoc univariate tests for effect of gender** | | | |
| --- | --- | --- | --- |
| Memory Description Content | Women Mean (SD)  [95% CI] | Men Mean (SD)  [95% CI] | Univariate Comparison |
| Perceptual (% words) | 6.48 (8.14)  [5.56, 7.37] | 5.55 (9.56)  [4.48, 6.41] | *F*(1, 376) = 2.33, *p* = .128, *η*2p = .006 |
| Social (% words) | 14.03 (12.61)  [12.65, 15.28] | 10.64 (12.72)  [9.52, 12.32] | *F*(1, 376) = 9.67, *p* = .002, *η*2p = .025* |
| Word Count (total words) | 17.87 (16.82)  [16.04, 20.47] | 16.58 (17.66)  [13.93, 18.64] | *F*(1, 376) = 1.44, *p* = .231, *η*2p = .004 |

* significant at the Dunn-Bonferroni-corrected level of *p* < .0167

**3. MANOVA (and post hoc univariate tests) for effects of cue type, age group, and gender on emotional responses (positive emotions, negative emotions, nostalgia, emotional intensity) for familiarity-matched cues (*N* = 382)**

| **MANOVA results** | |
| --- | --- |
| Effect | Statistical Result |
| Cue Type | *F*(4, 373) = 8.30, *p* < .001, *η*2p = .082*** |
| Age Group | *F*(8, 748) = 8.30, *p* = .028, *η*2p = .023* |
| Gender | *F*(4, 373) = 2.58, *p* = .037, *η*2p = .027* |
| Cue Type × Age Group | *F*(8, 748) = 2.27, *p* = .021, *η*2p = .024* |
| Cue Type × Gender | *F*(4, 373) = 1.06, *p* = .38, *η*2p = .011 |
| Age Group × Gender | *F*(8, 748) = 1.58, *p* = .13, *η*2p = .017 |
| Cue Type × Age Group × Gender | *F*(8, 748) = 1.46, *p* = .17, *η*2p = .015 |

Note: * = *p* < .05, ** = *p* < .01, *** = *p* < .001

| **Post hoc univariate tests for effect of cue type** | | | |
| --- | --- | --- | --- |
| Emotion Measure | MEAM Mean Rating (SD)  [95% CI] | TEAM Mean Rating (SD)  [95% CI] | Univariate Comparison |
| Positive Emotions | 3.30 (1.10)  [3.22, 3.45] | 3.08 (1.11)  [2.99, 3.22] | *F*(1, 376) = 19.91, *p* < .001, *η*2p = .050* |
| Negative Emotions | 1.79 (0.92)  [1.67, 1.86] | 1.88 (0.98)  [1.79, 1.99] | *F*(1, 376) = 5.40, *p* = .021, *η*2p = .014 |
| Nostalgia | 3.85 (1.35)  [3.72, 4.00] | 3.69 (1.36)  [3.56, 3.84] | *F*(1, 376) = 4.00, *p* = .046, *η*2p = .011 |
| Emotional Intensity | 3.95 (1.02)  [3.85, 4.06] | 3.65 (1.10)  [3.58, 3.80] | *F*(1, 376) = 17.08, *p* < .001, *η*2p = .043* |

* significant at the Dunn-Bonferroni-corrected level of *p* < .0125

None of the post hoc univariate tests for age group were statistically significant (*p*s > .26 following Dunn-Bonferroni correction).

For gender, the only statistically significant post hoc univariate test was for positive emotions (*F*(1, 376) = 7.16, *p* = .032 following Dunn-Bonferroni correction, *η2p* = .019), with men (*M* = 3.30, *SD* = 1.03, 95% CI [3.21, 3.50]) giving higher positive emotion ratings than women (*M* = 3.08, *SD* = 1.17, 95% CI [2.94, 3.22]).

For the interaction of cue type and age group, the only statistically significant post hoc univariate test was for positive emotions (*F*(2, 376) = 4.65, *p* = .040 following Dunn-Bonferroni correction, *η2p* = .024). Specifically, mean ratings of positive emotions evoked by the two cue types were very similar in the young age group (MEAMs: *M* = 3.21, *SD* = 1.20; TEAMs: *M* = 3.21, *SD* = 1.10; *t*(122) = -0.018, *p* > 1, in a paired-samples t-test with Dunn-Bonferroni correction). However, MEAMs were rated higher in positive emotions than TEAMs in the middle-aged group (MEAMs: *M* = 3.21, *SD* = 1.03; TEAMs: *M* = 2.92, *SD* = 1.08; *t*(130) = 3.34, *p* = .003 with Dunn-Bonferroni correction) and the oldest age group (MEAMs: *M* = 3.47, *SD* = 1.05; TEAMs: *M* = 3.10, *SD* = 1.14; *t*(127) = 5.00, *p* < .001 with Dunn-Bonferroni correction).
